# Supplementary material for: Source attribution of near-surface ozone trends in the United States during 1995–2019
Source: Copernicus journal article supplement (doi:10.5194/acp-23-5403-2023), 2023-05-15
Supplement: Supplementary file 1 [file acp-23-5403-2023-supplement.pdf]

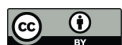

*Supplement of*

## **Source attribution of near-surface ozone trends in the United States during 1995–2019**

**Pengwei Li et al.**

*Correspondence to:* Yang Yang ([yang.yang@nuist.edu.cn](mailto:yang.yang@nuist.edu.cn))

The copyright of individual parts of the supplement might differ from the article licence.

**Table S1.** Global total emissions of NO<sub>x</sub>, NMVOCs and CO for different sectors in 1995 and 2019.

|                       | year | AGR  | ENE   | IND   | RCO    | SHP  | TRA    | SLV   | WST  | BMB   | SOIL/BIO | AIR  |
|-----------------------|------|------|-------|-------|--------|------|--------|-------|------|-------|----------|------|
| NO <sub>x</sub>       | 1995 | 1.23 | 9.19  | 4.24  | 3.16   | 5.11 | 11.34  |       | 0.39 | 4.48  | 7.98     | 0.67 |
| Tg N yr <sup>-1</sup> | 2019 | 1.61 | 7.83  | 5.25  | 2.53   | 6.02 | 11.26  |       | 0.74 | 4.00  | 7.98     | 1.19 |
| NMVOCs                | 1995 | 4.86 | 24.99 | 8.27  | 31.16  | 2.59 | 35.97  | 23.32 | 2.70 | 64.28 | 664.87   |      |
| Tg C yr <sup>-1</sup> | 2019 | 7.60 | 35.51 | 11.63 | 28.93  | 3.15 | 25.30  | 31.90 | 2.76 | 61.99 | 664.87   |      |
| CO                    | 1995 |      | 15.97 | 42.42 | 113.09 | 0.21 | 102.52 |       | 3.81 |       | 68.51    | 0.19 |
| Tg C yr <sup>-1</sup> | 2019 |      | 28.17 | 40.41 | 97.63  | 0.33 | 55.63  |       | 7.25 |       | 68.51    | 0.31 |

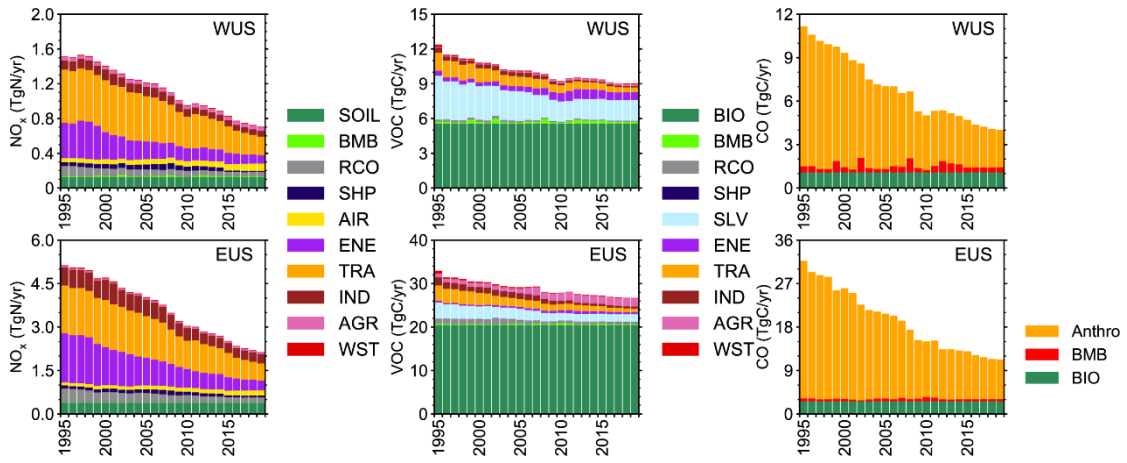

**Figure S1.** Time series of  $\text{NO}_x$ , NMVOCs, and CO emissions classified by source sectors in the western U.S. (WUS, 100–125°W, 30–45°N) and eastern U.S. (EUS, 70–100°W, 30–45°N).

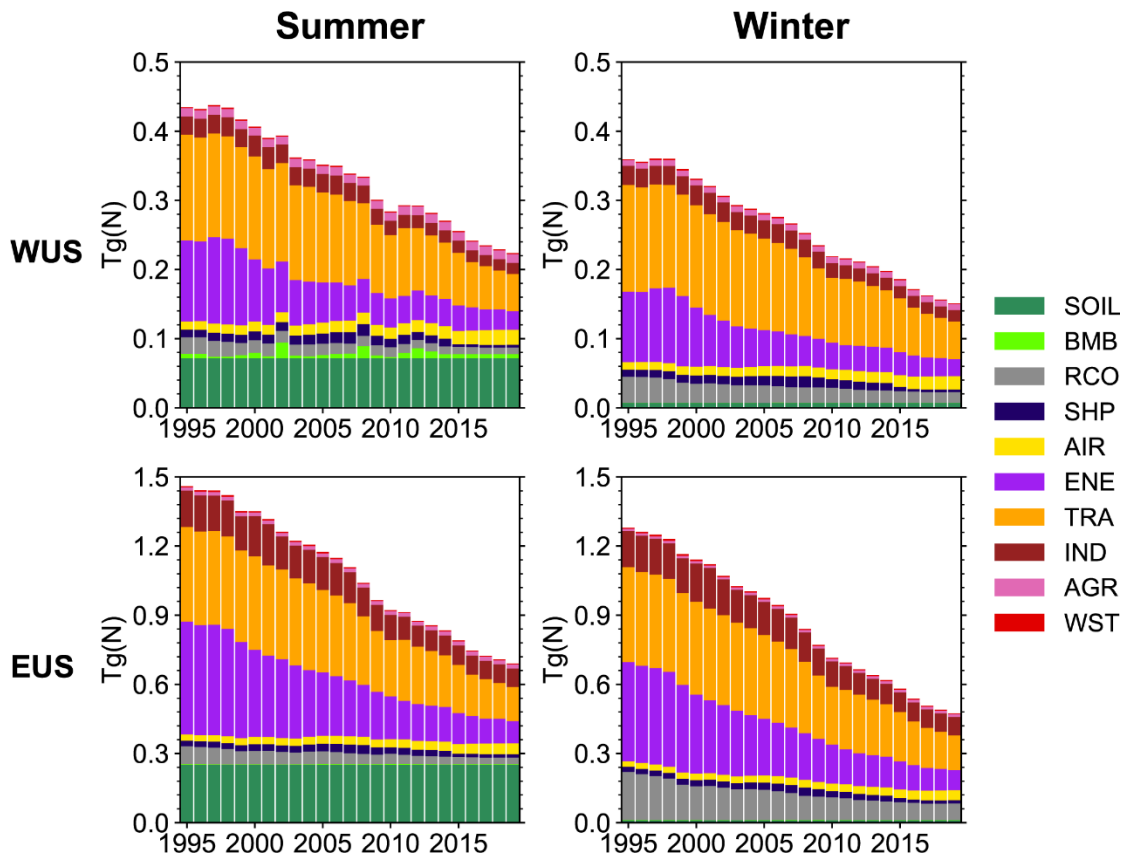

**Figure S2.** Time series of NO<sub>x</sub> emissions in summer (June, July and August, JJA) and winter (December, January and February, DJF) in WUS and EUS from different source sectors during 1995–2019.

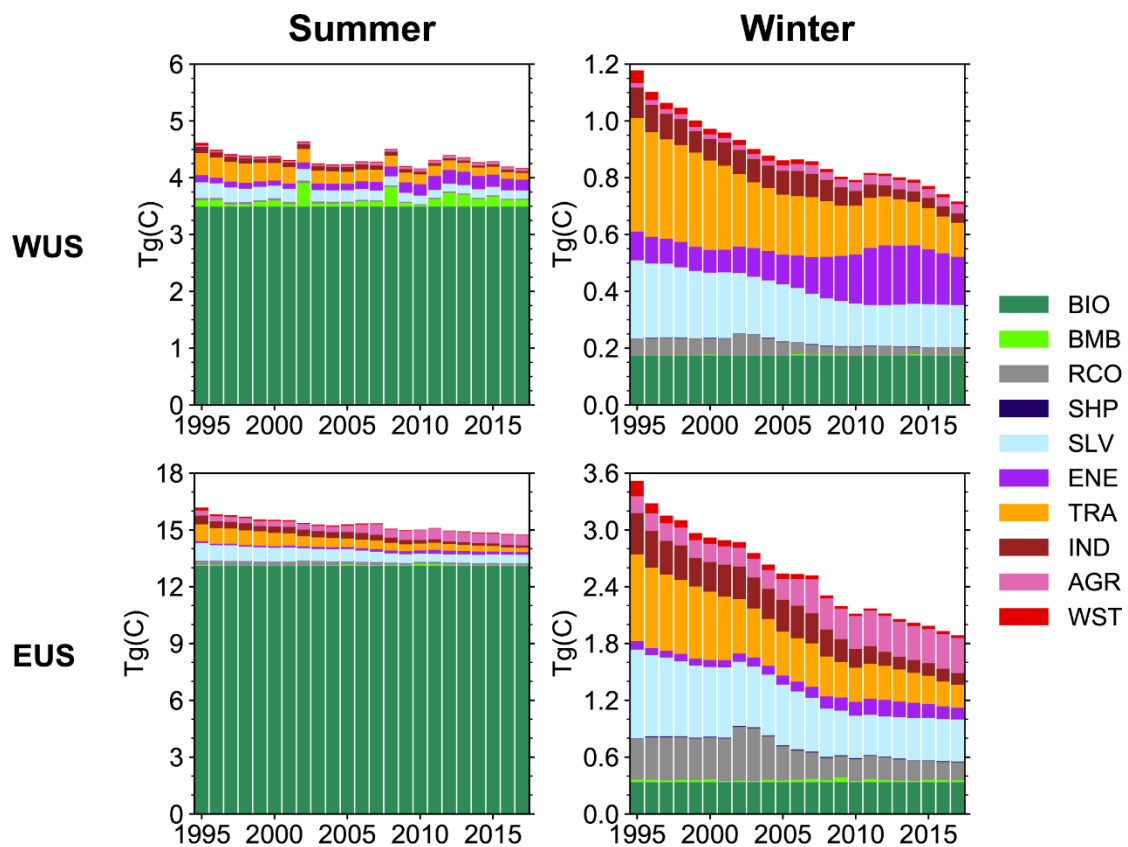

**Figure S3.** Time series of NMVOCs emissions in summer and winter in WUS and EUS from different source sectors during 1995–2019.

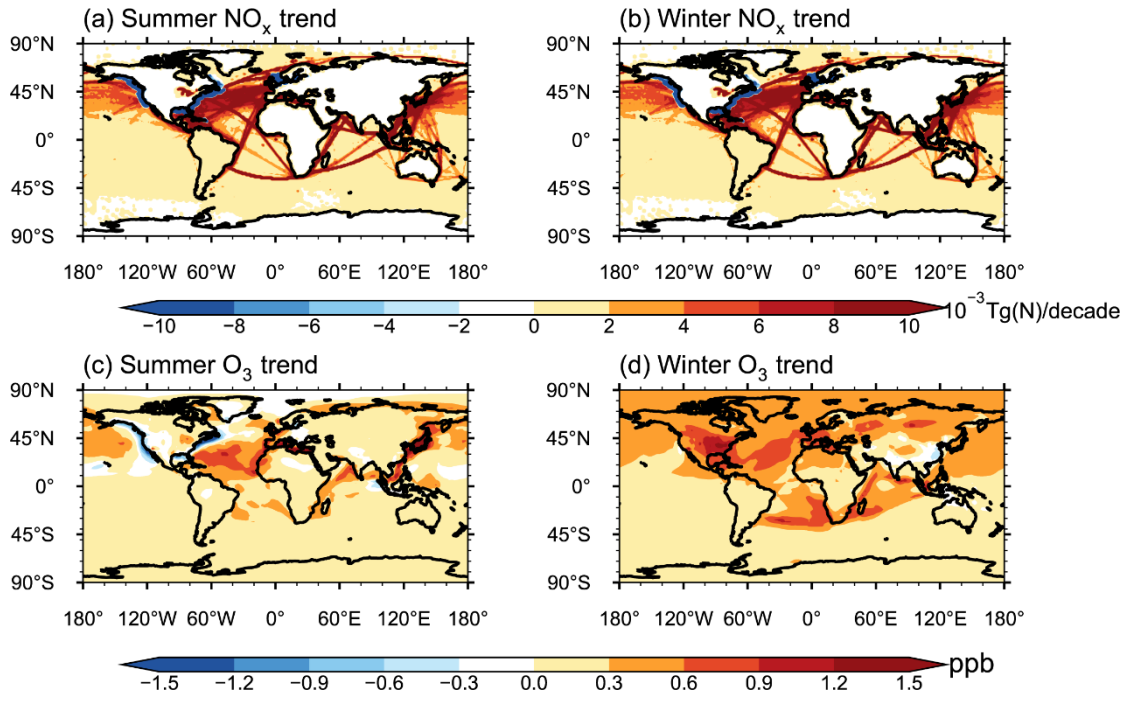

**Figure S4.** Trends of shipping emissions of NO<sub>x</sub> and O<sub>3</sub> trends contributed by shipping emissions in JJA and DJF from 1995 to 2019.

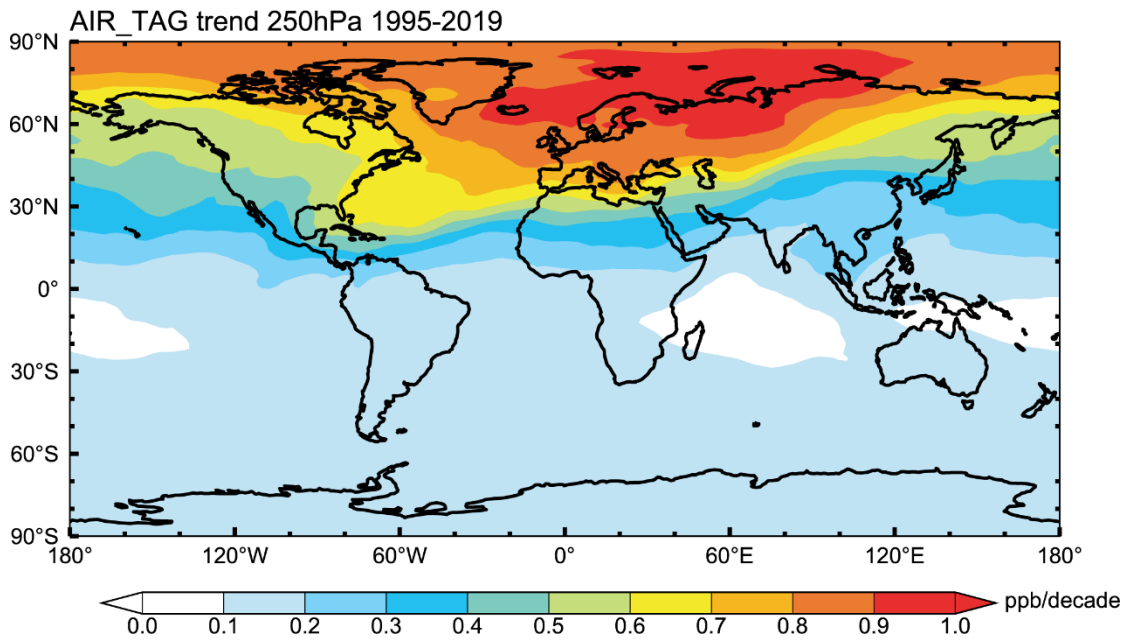

**Figure S5.** Annual O<sub>3</sub> trends contributed by aircraft at 250hPa from 1995-2019.

## NO<sub>x</sub> tagging

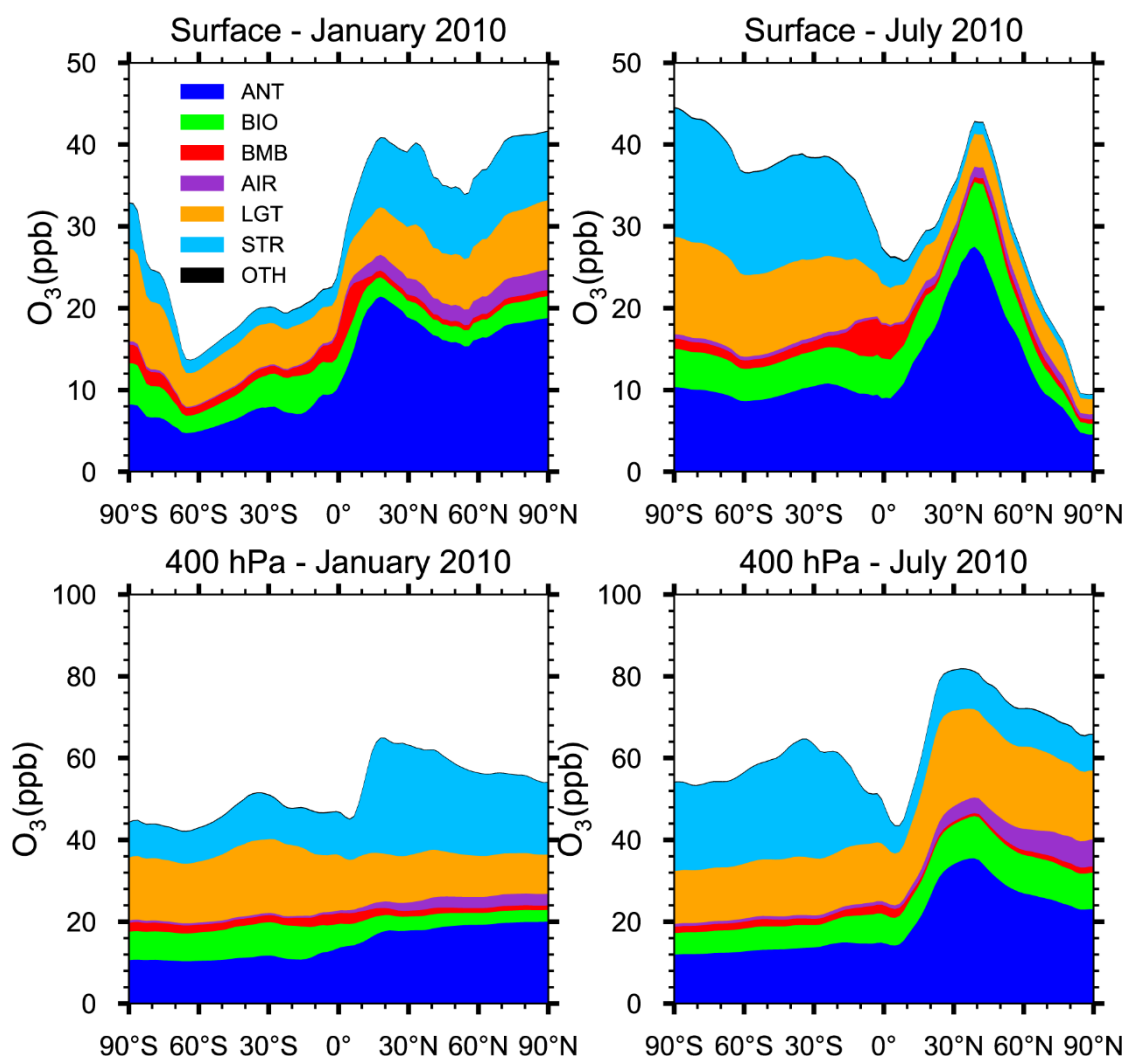

**Figure S6.** Zonal average of tagged ozone contributed from various sectors at the surface (a, b) and at 400 hPa (c, d) for January (a, c) and July (b, d) from the NO<sub>x</sub>-tagging run in 2010.



## VOC tagging

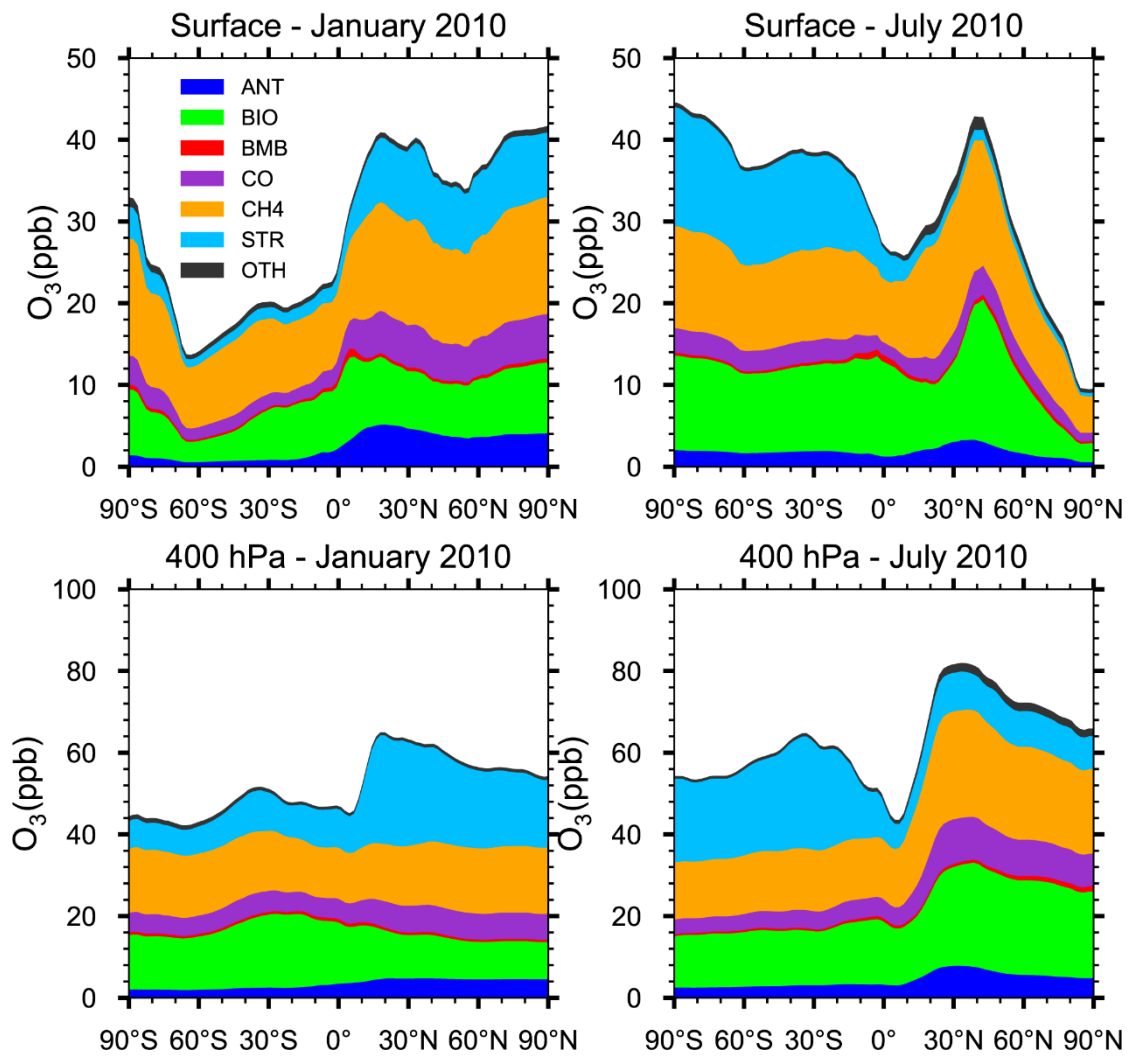

**Figure S7.** Zonal average of tagged ozone contributed from various sectors at the surface (a, b) and at 400 hPa (c, d) for January (a, c) and July (b, d) from the VOC-tagging run in 2010.

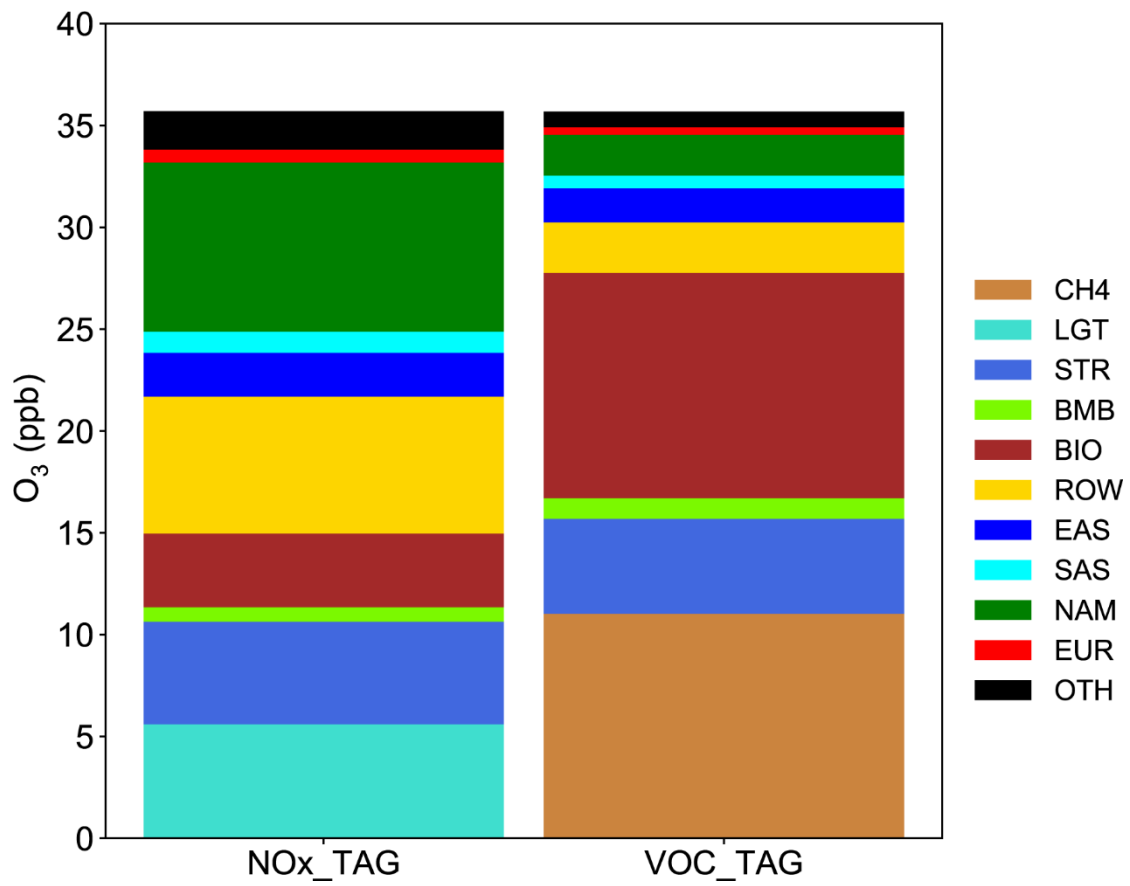

**Figure S8.** Source–receptor relationships for annual average surface O<sub>3</sub> mixing ratios (ppb) in North America from source region runs.
